1  
2  
3  
4  
5  
6  
7  
8  
9  
10  
11  
12  
13  
14  
15  
16  
17  
18  
19  
20  
21  
22  
23  
24  
25

# Pan-genome analysis reveals the molecular basis of niche adaptation of *Staphylococcus epidermidis* strains

Fei Su<sup>a,b\*</sup>, Rui Tian<sup>c\*</sup>, Yi Yang<sup>d\*</sup>, Lihui Zou<sup>b</sup>, Xiaomao Xu<sup>e</sup>, Dongke Chen<sup>f</sup>, Junhua Zhang<sup>b</sup>,  
Xue Chen<sup>f</sup>, Fei Xiao<sup>a,b</sup>, Gang Zhao<sup>g</sup>, Yanming Li<sup>e#</sup>, Hongtao Xu<sup>f#</sup>

<sup>a</sup>Clinical Biobank, <sup>b</sup>The Key Laboratory of Geriatrics, <sup>d</sup>Department of Otorhinolaryngology  
<sup>e</sup>Department of Respiratory and Critical Care Medicine, <sup>f</sup>Department of Laboratory Medicine,  
<sup>g</sup>Department of Surgery, Beijing Hospital, National Center of Gerontology, Beijing 100730,  
P. R. China  
<sup>c</sup>Department of Cardiovascular Disease, Beijing Anzhen Hospital, Capital Medical  
University, Beijing 100024, People's Republic of China

\*These authors contributed equally to this work

#Address correspondence to: Hongtao Xu, [xuhongtao2911@bjhmoh.cn](mailto:xuhongtao2911@bjhmoh.cn) or Yanming Li,  
[liyanming2632@bjhmoh.cn](mailto:liyanming2632@bjhmoh.cn)

**Running title:** Pan-genome analysis of Staphylococci

**Keywords:** *Staphylococcus epidermidis*, antimicrobial resistance, pan-genome, mobile  
genetic element

26 **Abstract**

27 *Staphylococcus epidermidis* is the most commonly isolated species from human skin and the  
28 second leading cause of bloodstream infections. Here, we performed a large-scale  
29 comparative study without any pre-assigned reference to identify genomic determinants  
30 associated with their diversity and adaptation as a “double-side spy”, a skin dominant  
31 colonization, and a successful pathogen. The pan-genome of *S. epidermidis* is open with 435  
32 core proteins and a pan-genome size of 8034 proteins. Genome-wide phylogenetic tree shows  
33 that whole genome sequence is a powerful tool to analyze the complex evolutionary process  
34 of *S. epidermidis* and investigate the source of infection. Comparative genome analyses  
35 demonstrate the high diversity of antimicrobial resistances, especially mobile genetic  
36 elements. The complicated relationships of host-bacterium and bacterium-bacterium help *S.*  
37 *epidermidis* to play a vital role in balancing the epithelial microflora. The highly variable and  
38 dynamic nature of the *S. epidermidis* genome may be the result of its success in adapting to  
39 broad habitats, which is necessary to deal with complex environments. This study gives the  
40 general landscape of *S. epidermidis* pan-genome and provides valuable insights into  
41 mechanisms for genome evolution and lifestyle adaptation of this ecologically flexible  
42 species.

43

44

## 45 **Introduction**

46 The coagulase-negative *Staphylococcus epidermidis* (*S. epidermidis*) is a common human  
47 skin commensal bacterium that can be cultured from virtually every body surface of healthy  
48 individuals. It also plays a central role in the skin microbiome [1, 2], it can keep the  
49 ecological balance of human skin microflora [3]. *S. epidermidis* can produce various  
50 bacteriocins, which kill other microorganisms and have frequently been proposed to enhance  
51 survival of the producer strains in a competitive fashion [4, 5]. Especially, serine protease  
52 Esp, secreted by *S. epidermidis*, can inhibit the biofilm formation of *S. aureus* and destroy  
53 pre-existing *S. aureus* biofilms [6].

54 However, *S. epidermidis* is the second most common cause of nosocomial infections, which  
55 in most cases are antibiotic-resistant [1, 7]. Antibiotic resistance remarkably complicates the  
56 treatment and increases the medical expenses [8]. The large gene pool of antibiotic resistance  
57 in *S. epidermidis* is shared with many other pathogenic species such as *S. aureus* [9]. Mobile  
58 genetic element, multidrug-resistant conjugative plasmids, arginine catabolic mobile element  
59 (ACME) [9], and staphylococcal chromosome cassette *mec* (SCC*mec*) elements [10]  
60 conferring  $\beta$ -lactam resistance are transferred frequently, enabling rapid evolution and  
61 adaptation against antibiotic selection pressure [11, 12]. When the protective layer of the  
62 human epithelium is breached and the mechanisms of host immunity fail, staphylococcal  
63 infections can become extremely dangerous and even fatal [13]. *S. epidermidis* is particularly  
64 associated with the increased use of indwelling medical devices such as artificial heart valves,  
65 prosthetic joints, and vascular catheters, which provide a substrate for biofilm formation. On  
66 the other hand, during the long-time “arms race”, human beings have developed versatile  
67 immunity system with antimicrobial peptides (AMPs) as the first line of innate immune  
68 defense on the human skin; meanwhile, *S. epidermidis* also owns multiple mechanisms such  
69 as surface charge alteration, extracellular proteases, exopolymers, and efflux pump proteins

70 to fight against AMPs [7]. The complex host-bacterium and bacterium-bacterium  
71 relationships make it necessary to investigate the genetic diversity, genome evolution, and  
72 lifestyle adaptation of *S. epidermidis*.

73 Much attention has been focused on understanding the evolution and spread of *S. epidermidis*  
74 by different methods [11, 14]. As the time goes on, high throughput sequencing is now fast  
75 and cheap and a large amount of genomics data about *S. epidermidis* are accumulated, it is  
76 essential to perform more comprehensive comparative and evolutionary study of ecologically  
77 diverse strains of *S. epidermidis* for better clinical management. Here, we compared the  
78 genomic features of *S. epidermidis* isolates of clinical and non-clinical relevance by using a  
79 pan-genome analysis of 198 publicly available *S. epidermidis* strains at the GenBank  
80 database of National Center for Biotechnology Information at April 30 of 2017. We  
81 assembled the consensus “pan-chromosome” without any pre-assigned genome reference and  
82 identified both core and variable regions within the chromosome. Second, we utilized a  
83 comparative genomics approach on 198 genomes to analyze the diversity of antibiotic  
84 resistance of *S. epidermidis*. Our results revealed that *S. epidermidis* isolates encoded a vast  
85 collection of genetic determinants and mechanisms to confer antibiotic resistance,  
86 antimicrobial peptides resistance, and survival adaptations. These analyses will provide  
87 insight into the coevolution of *S. epidermidis* as a nosocomial pathogen and directly aid the  
88 future efforts for large-scale epidemiological studies of this continuously evolving multi-drug  
89 resistant organism.

90

## 91 **Methods**

### 92 **Strains**

93 A total of 198 *S. epidermidis* isolates were selected to represent known diversity within the  
94 species and multiple locations and sources until April 30 of 2017, including reference  
95 genomes from *S. epidermidis* strain RP62A (Gill et al. 2005). All the available genome  
96 sequence of *S. epidermidis* strains and related annotation data were downloaded through the  
97 GenBank database [15] of NCBI (see Table S1 in the supplemental material).

### 98 **SCCmec and ACME typing**

99 An SCCmec sequence cassette database was prepared with the following accession numbers  
100 downloaded from NCBI: AB033763.2 (Type I), AB433542.1 (Type I.2), D86934.2 (Type II),  
101 AB261975.1 (Type II.4), AJ810123 (Type II-B), AB127982.1 (Type II-B), AM983545.1  
102 (Type II-D), HE858191.1 (Type II-E), AB037671.1 (Type III), HM030721.1 (Type IV),  
103 HM030720.1 (Type IV), AM292304.1 (ZH47 mobile elements), AB425824.1 (Type IV),  
104 EU437549.2 (Type IV-A), AB063172.2 (Type IV-A), AB063173 (Type IV-B), AY271717.1  
105 (Type IV-C), AB096217 (Type IV-C), AB245470.1 (Type IV-C), AB097677.1 (Type IV-D),  
106 AJ810121.1 (Type IV-E), DQ106887.1 (Type IV-G), AB633329.1 (Type IV-I), AB425823.1  
107 Type IV), AB121219.1 (Type V), AB478780.1 (Type V), AB512767.1 (Type V),  
108 AF411935.3 (Type VI), AB462393.1 (Type VII), AB373032.1 (Type V-C1), FJ670542.1  
109 (Type VIII), FJ390057.1 (Type VIII), AB505628.1 (Type IX), AB505630.1 (Type X), and  
110 FR821779.1 (Type XI) [16].

111 The ACME-*arcA* and ACME-*opp3AB* genes were used as markers of the ACME-*arc* cluster  
112 and the ACME-*opp3* cluster, respectively. ACME was classified as type I (contains the  
113 ACME-*arcA* and ACME-*opp3AB* gene clusters), type II (carries only the ACME-*arcA*  
114 locus), and type III (carries only the ACME-*opp3AB* locus) [17]. ACME-*arcA* and ACME-

115 *opp3AB* identified in this study were compared with the reference sequences of ACME-*arcA*  
116 (USA300\_FPR3757) and ACME-*opp3AB* (USA300\_FPR3757).

### 117 **kSNP *S. epidermidis* trees.**

118 A phylogenetic tree was inferred from single-nucleotide polymorphisms (SNPs) identified by  
119 kSNP (version: 3.0, <https://sourceforge.net/projects/ksnp/>) [18] by using a *k*-mer length 19  
120 nucleotides and based on a requirement that at least 80% of the genomes have a nucleotide at  
121 a given SNP position in order for the SNP to be considered to be a core and included in tree  
122 building. A total of 1832 core SNP positions were identified. These SNPs were used to infer  
123 a maximum-likelihood tree with RAxML [19] with 100 bootstrap replicates.

### 124 **Pan-genome analysis**

125 Cluster of orthologous proteins were generated with version 3.24 of PanOCT  
126 (<https://sourceforge.net/projects/panoct/>) as previous described [20]. Briefly, PanOCT deals  
127 with recently diverging paralogs by using neighborhood gene information. All the parameters  
128 were set to default values except for the length ratio to discard shorter protein fragments  
129 when a protein is split due to a frameshift or other mechanisms was set to 1.33 as  
130 recommended by the authors. Orthologous clusters were stringently defined as all sequences  
131 in a cluster having shared sequence identity  $\geq 70\%$  and coverage  $\geq 75\%$ . Plots and  
132 calculations of pan-genome sizes, new genes discovered and pan-genome status were also  
133 determined as described previously [21].

### 134 **Characterization of strains.**

135 *In silico* multilocus sequence typing of 198 strains was performed with the MLST 1.8 online  
136 server [22]. The antimicrobial resistance genes in the sequenced isolates were identified by  
137 BLASTp [23] searching with the databases of ARDB [24]. Genes conferring virulence  
138 factors were identified using BLASTp with VFDB [25]. Given that many virulence factors

139 for *S. epidermidis* that are not contained in the VFDB, we used the orthologous proteins and  
140 virulence factors from RP62a [26] and ATCC1228 [27] to make up the missing information.

#### 141 **Functional analysis**

142 All genes are BLASTed against all sequences in the database of KOBAS 2.0  
143 (<http://kobas.cbi.pku.edu.cn/>) [28]. The cutoffs are BLASTp *E*-value  $< 10^{-5}$  and BLAST  
144 subject coverage  $> 70\%$ . We used the genes from same genome as the default background  
145 distribution and considered only pathways for which there were at least two genes mapped.  
146 Fisher's exact test was choosing to perform statistical test and Bonferroni correction was used  
147 to reduce the high overall Type-I error with `p.adjust` from R package.

#### 148 **Statistical analyses**

149 The differences in the prevalence of antimicrobial resistance genes and phenotypes among  
150 isolates were analyzed by using two-tailed Fisher's exact test and Bonferroni correction was  
151 also performed as mentioned above. All the statistical analyses were carried out using R  
152 package (version: 3.3). A *P* value of  $< 0.05$  was regarded as statistically significant.

153

## 154 **Results**

### 155 **Core pan-genome of *S. epidermidis***

156 Despite the intensive effort to characterize *S. epidermidis* and the sizable number of whole  
157 genome comparisons in literature [29], more and more genome data is rapid accumulated and  
158 could easily obtained from public database, such as NCBI. Using PanOCT, a total of 8,034  
159 orthologous protein clusters were identified from a collection of all *S. epidermidis* genomes  
160 publicly available at the time of the analysis (Supplementary Table S1). PanOCT only  
161 includes non-paralogs in clusters and uses conserved gene neighborhood to separate  
162 duplicated genes. This means that insertion sequence elements that are in novel contexts will  
163 often form singleton clusters even though they are identical in sequence to other IS elements  
164 within or between genomes analyzed. When the “core” pan-genome is defined to be present  
165 at all 198 genomes analyzed, there were 435 (5.4 %) core protein clusters and 2915 (36.3 %) novel clusters (groups with a single member from a single genome) (Fig. 1a). To predict the  
166 theoretical maximum pan-genome size (i.e., the total number of genes, including core, unique,  
167 and dispensable genes) a pan-genome model was implemented using medians and an  
168 exponential decay function (Fig. 1b). The maximum pan-genome size was estimated to be  
169  $12,554 \pm 65$  genes. To determine whether the *S. epidermidis* pan-genome is open or closed,  
170 the number of new genes identified (i.e., unique or strain-specific genes) for each genome  
171 added was determined and fit to a power law function ( $n = \kappa N^{-\alpha}$ ) as described previously  
172 [21]. According to the result, we found the pan-genome of *S. epidermidis* appeared to be  
173 open ( $\alpha = 0.226 \pm 0.002$ ; Fig. 1b). For each genome added, the number of new genes was  
174 extrapolated by calculating  $tg(\theta)$ , which was determined to be  $7.7 \pm 0.4$  (Fig. 1b).  
175  
176 The function of the genes within the variable genome was investigated by assigning all gene  
177 clusters to clusters of orthologous groups (COGs) categories [30] and the results showed that  
178 novel genes were most likely to be assigned to categories (Supplementary Table S2 and S3)



179 such as mobilome, ribosomal structure and biogenesis, carbohydrate transport and  
180 metabolism, and nucleotide transport and metabolism, based on the result of Fisher's exact  
181 test.

## 182 **Phylogenetic relationship of *S. epidermidis* isolates**

183 To estimate the genetic relationships among *S. epidermidis* strains, we compared all 198  
184 genomes by using a single nucleotide polymorphism-based phylogeny. SNPs were identified  
185 from the combined set of genome sequences by using kSNP. Nucleotide positions present in  
186 at least 80 % of all genomes were used to build a Maximum-Likelihood phylogenetic tree  
187 with RAxML following the tutorial. Strikingly, the 198 *S. epidermidis* isolates formed two  
188 distinct groups (Fig. 3), called Cluster A (solid line) and B (dotted line). Most of Sequence  
189 Type (ST) 2 nosocomial isolates were near identical at the nucleotide level for all core genes  
190 (Supplementary Table S4). All of ST 2 strains in this study presented in Cluster A and had an  
191 extremely short evolutionary distance from each other, indicating that these strains were  
192 probably derived from a recent common ancestor. By contrast, Cluster B represents a lineage  
193 with reduced virulence and all of ST 5 commensal strains presented in Cluster B and  
194 clustered together. The rest of Cluster B had a much longer evolutionary distance from ST 5  
195 strains. This clade may have more complex history of evolution and produce a various sub-  
196 group.

## 197 **Antimicrobial resistance across *S. epidermidis***

198 Antimicrobial resistance (AMR) is very common among *S. epidermidis* isolates and often  
199 limits treatment options [31]. Given the clinical importance of AMR in *S. epidermidis*, we  
200 performed a genome-wide analysis of all known AMR genes within our genomic dataset.  
201 According to the analysis of ARDB database, we found 28 different types of genes involved  
202 in 31 antibiotics (Fig. 3). Nearly all isolates carry at least one type antibiotic resistance gene.  
203 Among the genes involved in antimicrobial resistance, our data showed that there were two

204 genes, *norA* and *bacA*, conserved in all strains. Based on the enrichment analysis of strains  
205 from different sources, we found that strains from sources (skin, blood, environment and  
206 plant) had significantly different antibiotic resistance profiles: isolates from blood (9  
207 antibiotic resistance genes) and skin (8 antibiotic resistance genes) had significantly enriched  
208 antibiotics (Supplementary Table S5), while isolates from environment had no significantly  
209 enriched antibiotics. First-line antibiotic therapy for catheter-related bloodstream infections  
210 was vancomycin. None of the isolates were resistant to the antibiotic at the genetic level,  
211 regardless of isolation source.

### 212 **SCC*mec* and ACME in *S. epidermidis***

213 SCC*mec*, or *staphylococcal* cassette chromosome *mec*, is a mobile genetic element that  
214 carries the central determinant for broad-spectrum beta-lactam resistance encoded by the  
215 *mecA* gene a mobile genetic element of *Staphylococcus* bacterial species [10, 32]. According  
216 to the completeness of genome in this study (only 7 complete genome sequences), we only  
217 analyzed the genes from well-defined SCC*mec* genomic islands [33]. There were 58.6 %  
218 (116/198) of *S. epidermidis* strains, in which complete *mec* gene complexes, *mecA*, and  
219 *mecR1* genes were detected (Supplementary Table S1). However, only 39.4 % (78/198) of  
220 strains had *ccr* gene complex from type IV cassette, in which both *ccrA* and *ccrB* were  
221 present. Similar to the previous results [29, 34], nearly all of the ST2 nosocomial isolates  
222 (94.6 %, 70/74) had at least one copy of *mecA* from type IX cassette and *mecR1* from Type  
223 VIII or IV-G cassette. On the other hand, a high prevalence (98 %, 195/198) of ACME was  
224 found in *S. epidermidis* strains in this study, of which 22.7 % (45/198) was type I and 75.8%  
225 (150/198) was type II.

### 226 **Biofilm formation of *S. epidermidis***

227 Biofilm formation is the major of virulence factor of *S. epidermidis* strains, which will  
228 contribute to the persistence of clinical infection. Here, we analyze some well-known genes

229 involved in biofilm formation such as adhesive molecules, including polysaccharide  
 230 intercellular adhesin (*icaABCD*), proteinaceous factors (*bhp* and *aap*), teichoic acids,  
 231 extracellular DNA and so on (Supporting information Table S6). The polysaccharide  
 232 intercellular adhesion (*icaABCD*) genes that encode biofilm-associated genes for poly-N-  
 233 acetylglucosamine synthesis were found in 60% of the commensal isolates, in agreement with  
 234 previous studies [34]. Especially, any of the *ica* genes was not found in some ST 2 strains  
 235 (Fig. 4). Gene *aap* was enriched in the blood (adjusted *P*-value < 0.01) compared to the  
 236 remaining isolates and therefore might be a potential biomarker for *S. epidermidis* infection.  
 237 We analyze the enrichment of all genes involved in virulence factors and found the *icaABCD*  
 238 was significantly enriched despite the sources or sequence types.

### 239 **Human-Bacterium and Bacterium-bacterium interactions in *S. epidermidis***

240 *S. epidermidis* is the major colonization microorganisms in the human skin with complex  
 241 human-bacterium and bacterium-bacterium interactions. We analyzed the genes (Table 1 and  
 242 supplementary Table S5) involved in resistance against antimicrobial peptides that can inhibit  
 243 the growth of most skin microorganism including *S. epidermidis*. Some genes (e.g.  
 244 *capABCD*), which are significantly enriched in the blood and skin, were reported to assist the  
 245 strain to survive on the skin surface [7]. We also analyzed genes involved in bacterium-  
 246 bacterium interactions. We found that the genes involved in short-chain fatty acids  
 247 biosynthesis and extracellular proteases (e.g. Esp) had no difference despite the isolates.

248 Table 1 *S. epidermidis* resistance mechanisms that target AMPs.

| Resistance mechanism            | Gene                     | Target AMPs        | Functions                            | Enrichment                   |
|---------------------------------|--------------------------|--------------------|--------------------------------------|------------------------------|
| AMP sensing                     | <i>apsSRX</i>            | Most cationic AMPs | 3-component sensor/regulator         | -                            |
|                                 | <i>braSR/braDE/vraDE</i> | Bacitracin, nisin  |                                      | -                            |
| Phosphatidylglycerol lysylation | <i>mprF</i>              | Most cationic AMPs | Lysylation of membrane phospholipids | -                            |
| Teichoic acids alanylation      | <i>dltABCD</i>           | Most cationic AMPs | Alanylation of teichoic acids        | Blood / Skin ( <i>dltD</i> ) |
| Exopolymers                     | <i>icaADBC</i>           | HBD3, LL-37, DCD-1 | Production of PNAG                   | Blood( <i>icaB</i> )         |

|                         |                 |                                      |                             |   |
|-------------------------|-----------------|--------------------------------------|-----------------------------|---|
|                         |                 |                                      | exopolysaccharide; IcaB     |   |
|                         |                 |                                      | <i>N</i> -acetylglucosamine |   |
|                         |                 |                                      | deacetylase introduces      |   |
|                         |                 |                                      | positive charge             |   |
|                         | <i>cap</i> ABCD | HBD3, LL-37, DCD-1                   |                             |   |
| Extracellular proteases | <i>sepA</i>     | LL-37                                | Degrades AMPs               | - |
|                         | <i>esp</i>      | LL-37a                               |                             | - |
| ABC transporters        | <i>vra</i> FG   | Vancomycin, polymyxin B,<br>colistin | Putative AMP exporter       | - |

---

249

250

## 251 Discussion

252 *S. epidermidis* is a coagulase-negative and Gram-positive staphylococcus that is part of the  
253 normal mucosa and skin microflora in humans and other mammals [2]. It is the second  
254 leading cause of nosocomial infections [35]. Although it is a saprophyte, opportunistic  
255 pathogen with plenty of antibiotic resistance and virulence factors [36], this natural skin  
256 colonizer plays a critical role in balancing the epithelial microflora [1, 37]. As an innocuous  
257 commensal microorganism, for a long time *S. epidermidis* has been seen as an avirulent  
258 species. With the accumulation of genomic sequences, we can now further explore the  
259 genetic mechanisms of environmental adaptability of *S. epidermidis*, the evolution process  
260 during the outbreak, and the molecular biomarkers for clinic diagnosis [1, 38].

261 In our current pan-genome analysis, *S. epidermidis* had a relatively compact genome with a  
262 size of about 2.5 Mb, and yet almost 20% of this genome was in flux, exchanging with a  
263 large pool of various genes. These findings were similar to what had been reported by Conlan  
264 and colleagues [29]. The significant number of genes involved in mobilome make horizontal  
265 gene transfer easier between the *Staphylococcus* strains and lead to the increase of the “open”  
266 pan-genome [39]. Besides, mobile genetic elements, such as SCC*mec*, ACME and plasmids,  
267 make the genome structure more unpredictable [40]. High-resolution phylogenetic tree  
268 constructed from genome-wide SNPs reveal important details not seen by traditional multi-  
269 locus sequence typing (MLST) or single gene marker (16S rDNA). From the phylogenetic  
270 tree, we found the ST2 isolates had an extremely short evolutionary distance from each other.  
271 The genetic markers *mecA* and *icaA*, which are used to predict the antimicrobial resistance  
272 and biofilm phenotypes, have been shown to be more common in hospital isolates than in  
273 non-hospital isolates; however, these markers have much less power to distinguish infection  
274 isolates from commensally available isolates that contaminate clinical specimens [41].  
275 According to the enrichment analysis, we found it was impossible to distinguish the strains of

276 blood from that of skin, both of which had a similar lifestyle and genetic background.  
277 However, it is possible to identify the strains from other habitats with biomarkers such as  
278 *ica*ABCD and *cap*ABCD. Whole genome sequencing has been proved to be a more powerful  
279 routine diagnostic tool than the traditional MLST or RT-PCR because it can rapidly identify  
280 the infection source and antibiotic resistance in an affordable manner [42, 43]. As more  
281 genetic data of *S. epidermidis* have been available and new machine learning algorithm is  
282 developed [41], WGS may help to predict the infection isolation sources and antibiotic  
283 resistance in a quicker and more accurate manner.

284 *S. epidermidis* has very complicated relationship with human and other bacteria.  
285 Antimicrobial peptides (AMPs) play an important role in providing immunity to bacterial  
286 colonization on human epithelia. Recent research has shown that staphylococci have multiple  
287 systems to combat AMP activity, including AMP sensor that can regulate the expressions of  
288 genes involved in AMP resistance depending on the presence of AMPs [7]. We analyzed the  
289 distribution of gene involved in AMP resistance and found significant enrichment in blood  
290 and skin and variable in different strains, which may be the consequence of coevolution of  
291 human's immune system. On the other side, *S. epidermidis* strains also can inhibit the growth  
292 of other bacterium to be dominant species on the skin surface. Serine protease Esp, which is  
293 secreted by *S. epidermidis*, has been found to be able to inhibit the biofilm formation of *S.*  
294 *aureus* and destroy pre-existing *S. aureus* biofilms [6]. Other mechanisms are also involved  
295 in fighting against pathogens and maintaining homeostasis [44, 45]. On the other hand, *S.*  
296 *epidermidis* was found to be a reservoir of antibiotic resistance, with its virulence  
297 determinants shared with other more pathogenic species such as *S. aureus*, as demonstrated in  
298 previous studies [29]. In particular, SCC*mec*, ACME elements conferring  $\beta$ -lactam resistance,  
299 and other genes are transferred frequently between *Staphylococcus* strains, enabling rapid  
300 evolution and adaptation against antibiotic selection pressure and provide additional

301 competitive advantage. For instance, type III of SCC*mec* carries a phenol soluble modulin  
302 *psm-mec*, which may affect the virulence of *S. aureus* [40].

303 In conclusion, our current study provides information on the molecular characteristics of *S.*  
304 *epidermidis* strains isolated from different environments from all over the world. From a  
305 genomics perspective, the pan-genome analysis of the *S. epidermidis* reveals a high level of  
306 diversity among the generic and species-specific genes and the potential supply routes for  
307 enhanced versatility via inter- and intra-species horizontal gene transfer. Frequent horizontal  
308 gene transfer enables the *Staphylococcus* to adapt to complex environments (e.g., high-level  
309 antibiotic), and it may continue to be the dominant genus over the next few years. The  
310 understanding of the mechanisms of gene transfer helps us to better prevent the emergence of  
311 epidemic pan-drug resistant *S. epidermidis* strains.

312

313 **List of abbreviations**

314 *SCCmec*: Staphylococcal chromosome cassette *mec*

315 AMPs: Antimicrobial peptides

316 SNPs: Single-nucleotide polymorphisms

317 COGs: Clusters of orthologous groups

318 ST: Sequence type

319 AMR: Antimicrobial resistance

320



321

322 **Acknowledgments**

323 This work was supported by the National Key Research and Development Program of China  
324 (Grant 2018YFC2000500), CAMS Innovation Fund for Medical Sciences (2018-I2M-1-002),  
325 the Applied Research Program of Capital Clinical Features (Grant Z18110001718172), the  
326 Key Research Program for Health Care in China (Grant W2016ZD01).

327 The authors declare that they have no competing interests.

328

329 References

- 330 1. Otto M: **Staphylococcus epidermidis - the "accidental" pathogen.** *Nat Rev Microbiol*  
331 2009, **7**(8):555-567.
- 332 2. Oh J, Byrd AL, Park M, Program NCS, Kong HH, Segre JA: **Temporal Stability of the**  
333 **Human Skin Microbiome.** *Cell* 2016, **165**(4):854-866.
- 334 3. Schommer NN, Gallo RL: **Structure and function of the human skin microbiome.**  
335 *Trends Microbiol* 2013, **21**(12):660-668.
- 336 4. Jack RW, Tagg JR, Ray B: **Bacteriocins of gram-positive bacteria.** *Microbiol Rev* 1995,  
337 **59**(2):171-200.
- 338 5. Jetten AM, Vogels GD: **Mode of action of a Staphylococcus epidermidis bacteriocin.**  
339 *Antimicrob Agents Chemother* 1972, **2**(6):456-463.
- 340 6. Iwase T, Uehara Y, Shinji H, Tajima A, Seo H, Takada K, Agata T, Mizunoe Y:  
341 **Staphylococcus epidermidis Esp inhibits Staphylococcus aureus biofilm formation**  
342 **and nasal colonization.** *Nature* 2010, **465**(7296):346-349.
- 343 7. Joo HS, Otto M: **Mechanisms of resistance to antimicrobial peptides in**  
344 **staphylococci.** *Biochimica et biophysica acta* 2015, **1848**(11 Pt B):3055-3061.
- 345 8. Foster TJ: **Antibiotic resistance in Staphylococcus aureus. Current status and future**  
346 **prospects.** *FEMS Microbiol Rev* 2017.
- 347 9. Diep BA, Gill SR, Chang RF, Phan TH, Chen JH, Davidson MG, Lin F, Lin J, Carleton HA,  
348 Mongodin EF *et al*: **Complete genome sequence of USA300, an epidemic clone of**  
349 **community-acquired methicillin-resistant Staphylococcus aureus.** *Lancet* 2006,  
350 **367**(9512):731-739.
- 351 10. McManus BA, Coleman DC, Deasy EC, Brennan GI, B OC, Monecke S, Ehricht R,  
352 Leggett B, Leonard N, Shore AC: **Comparative Genotypes, Staphylococcal Cassette**  
353 **Chromosome mec (SCCmec) Genes and Antimicrobial Resistance amongst**  
354 **Staphylococcus epidermidis and Staphylococcus haemolyticus Isolates from**  
355 **Infections in Humans and Companion Animals.** *PloS one* 2015, **10**(9):e0138079.
- 356 11. Miragaia M, Thomas JC, Couto I, Enright MC, de Lencastre H: **Inferring a population**  
357 **structure for Staphylococcus epidermidis from multilocus sequence typing data.** *J*  
358 *Bacteriol* 2007, **189**(6):2540-2552.
- 359 12. Bloemendaal AL, Brouwer EC, Fluit AC: **Methicillin resistance transfer from**  
360 **Staphylococcus epidermidis to methicillin-susceptible Staphylococcus aureus in a**  
361 **patient during antibiotic therapy.** *PloS one* 2010, **5**(7):e11841.
- 362 13. Yao Y, Sturdevant DE, Villaruz A, Xu L, Gao Q, Otto M: **Factors characterizing**  
363 **Staphylococcus epidermidis invasiveness determined by comparative genomics.**  
364 *Infection and immunity* 2005, **73**(3):1856-1860.
- 365 14. Meric G, Miragaia M, de Been M, Yahara K, Pascoe B, Mageiros L, Mikhail J, Harris LG,  
366 Wilkinson TS, Rolo J *et al*: **Ecological Overlap and Horizontal Gene Transfer in**  
367 **Staphylococcus aureus and Staphylococcus epidermidis.** *Genome biology and*  
368 *evolution* 2015, **7**(5):1313-1328.
- 369 15. Benson DA, Cavanaugh M, Clark K, Karsch-Mizrachi I, Lipman DJ, Ostell J, Sayers EW:  
370 **GenBank.** *Nucleic Acids Res* 2013, **41**(Database issue):D36-42.
- 371 16. Ugolotti E, Larghero P, Vanni I, Bandettini R, Tripodi G, Melioli G, Di Marco E, Raso A,  
372 Biassoni R: **Whole-genome sequencing as standard practice for the analysis of**  
373 **clonality in outbreaks of methicillin-resistant Staphylococcus aureus in a paediatric**  
374 **setting.** *The Journal of hospital infection* 2016, **93**(4):375-381.

- 375 17. Barbier F, Lebeaux D, Hernandez D, Delannoy AS, Caro V, Francois P, Schrenzel J,  
376 Ruppe E, Gaillard K, Wolff M *et al*: **High prevalence of the arginine catabolic mobile**  
377 **element in carriage isolates of methicillin-resistant *Staphylococcus epidermidis*. *J***  
378 ***Antimicrob Chemother* 2011, **66**(1):29-36.**
- 379 18. Gardner SN, Slezak T, Hall BG: **kSNP3.0: SNP detection and phylogenetic analysis of**  
380 **genomes without genome alignment or reference genome. *Bioinformatics* 2015,**  
381 ****31**(17):2877-2878.**
- 382 19. Stamatakis A: **RAxML version 8: a tool for phylogenetic analysis and post-analysis**  
383 **of large phylogenies. *Bioinformatics* 2014, **30**(9):1312-1313.**
- 384 20. Fouts DE, Brinkac L, Beck E, Inman J, Sutton G: **PanOCT: automated clustering of**  
385 **orthologs using conserved gene neighborhood for pan-genomic analysis of**  
386 **bacterial strains and closely related species. *Nucleic Acids Res* 2012, **40**(22):e172.**
- 387 21. Tettelin H, Massignani V, Cieslewicz MJ, Donati C, Medini D, Ward NL, Angiuoli SV,  
388 Crabtree J, Jones AL, Durkin AS *et al*: **Genome analysis of multiple pathogenic**  
389 **isolates of *Streptococcus agalactiae*: implications for the microbial "pan-genome".**  
390 ***Proc Natl Acad Sci U S A* 2005, **102**(39):13950-13955.**
- 391 22. Larsen MV, Cosentino S, Rasmussen S, Friis C, Hasman H, Marvig RL, Jelsbak L,  
392 Sicheritz-Ponten T, Ussery DW, Aarestrup FM *et al*: **Multilocus sequence typing of**  
393 **total-genome-sequenced bacteria. *J Clin Microbiol* 2012, **50**(4):1355-1361.**
- 394 23. Altschul SF, Gish W, Miller W, Myers EW, Lipman DJ: **Basic local alignment search**  
395 **tool. *J Mol Biol* 1990, **215**(3):403-410.**
- 396 24. Liu B, Pop M: **ARDB--Antibiotic Resistance Genes Database. *Nucleic Acids Res* 2009,**  
397 ****37**(Database issue):D443-447.**
- 398 25. Chen L, Xiong Z, Sun L, Yang J, Jin Q: **VFDB 2012 update: toward the genetic**  
399 **diversity and molecular evolution of bacterial virulence factors. *Nucleic Acids Res***  
400 **2012, **40**(Database issue):D641-645.**
- 401 26. Gill SR, Fouts DE, Archer GL, Mongodin EF, Deboy RT, Ravel J, Paulsen IT, Kolonay JF,  
402 Brinkac L, Beanan M *et al*: **Insights on evolution of virulence and resistance from**  
403 **the complete genome analysis of an early methicillin-resistant *Staphylococcus***  
404 ***aureus* strain and a biofilm-producing methicillin-resistant *Staphylococcus***  
405 ***epidermidis* strain. *J Bacteriol* 2005, **187**(7):2426-2438.**
- 406 27. Zhang YQ, Ren SX, Li HL, Wang YX, Fu G, Yang J, Qin ZQ, Miao YG, Wang WY, Chen RS  
407 *et al*: **Genome-based analysis of virulence genes in a non-biofilm-forming**  
408 ***Staphylococcus epidermidis* strain (ATCC 12228). *Mol Microbiol* 2003, **49**(6):1577-**  
409 **1593.**
- 410 28. Xie C, Mao X, Huang J, Ding Y, Wu J, Dong S, Kong L, Gao G, Li CY, Wei L: **KOBAS 2.0:**  
411 **a web server for annotation and identification of enriched pathways and diseases.**  
412 ***Nucleic Acids Res* 2011, **39**(Web Server issue):W316-322.**
- 413 29. Conlan S, Mijares LA, Program NCS, Becker J, Blakesley RW, Bouffard GG, Brooks S,  
414 Coleman H, Gupta J, Gurson N *et al*: ***Staphylococcus epidermidis* pan-genome**  
415 **sequence analysis reveals diversity of skin commensal and hospital infection-**  
416 **associated isolates. *Genome Biol* 2012, **13**(7):R64.**
- 417 30. Tatusov RL, Fedorova ND, Jackson JD, Jacobs AR, Kiryutin B, Koonin EV, Krylov DM,  
418 Mazumder R, Mekhedov SL, Nikolskaya AN *et al*: **The COG database: an updated**  
419 **version includes eukaryotes. *BMC Bioinformatics* 2003, **4**:41.**
- 420 31. Kleinschmidt S, Huygens F, Faoagali J, Rathnayake IU, Hafner LM: ***Staphylococcus***  
421 ***epidermidis* as a cause of bacteremia. *Future microbiology* 2015, **10**(11):1859-1879.**

- 422 32. (IWG-SCC) IWGotCoSCCE: **Classification of staphylococcal cassette chromosome**  
423 **mec (SCCmec): guidelines for reporting novel SCCmec elements.** *Antimicrob Agents*  
424 *Chemother* 2009, **53**(12):4961-4967.
- 425 33. Kos VN, Desjardins CA, Griggs A, Cerqueira G, Van Tonder A, Holden MT, Godfrey P,  
426 Palmer KL, Bodi K, Mongodin EF *et al*: **Comparative genomics of vancomycin-**  
427 **resistant Staphylococcus aureus strains and their positions within the clade most**  
428 **commonly associated with Methicillin-resistant S. aureus hospital-acquired**  
429 **infection in the United States.** *mBio* 2012, **3**(3):e00112-00112.
- 430 34. Du X, Zhu Y, Song Y, Li T, Luo T, Sun G, Yang C, Cao C, Lu Y, Li M: **Molecular analysis**  
431 **of Staphylococcus epidermidis strains isolated from community and hospital**  
432 **environments in China.** *PloS one* 2013, **8**(5):e62742.
- 433 35. Ziebuhr W, Hennig S, Eckart M, Kranzler H, Batzilla C, Kozitskaya S: **Nosocomial**  
434 **infections by Staphylococcus epidermidis: how a commensal bacterium turns into a**  
435 **pathogen.** *Int J Antimicrob Agents* 2006, **28 Suppl 1**:S14-20.
- 436 36. Namvar AE, Bastarahang S, Abbasi N, Ghehi GS, Farhadbakhtarian S, Arezi P,  
437 Hosseini M, Baravati SZ, Jokar Z, Chermahin SG: **Clinical characteristics of**  
438 **Staphylococcus epidermidis: a systematic review.** *GMS Hyg Infect Control* 2014,  
439 **9**(3):Doc23.
- 440 37. Otto M: **Staphylococcus colonization of the skin and antimicrobial peptides.** *Expert*  
441 *review of dermatology* 2010, **5**(2):183-195.
- 442 38. Didelot X, Bowden R, Wilson DJ, Peto TE, Crook DW: **Transforming clinical**  
443 **microbiology with bacterial genome sequencing.** *Nat Rev Genet* 2012, **13**(9):601-  
444 612.
- 445 39. Palmer KL, Kos VN, Gilmore MS: **Horizontal gene transfer and the genomics of**  
446 **Enterococcal antibiotic resistance.** *Curr Opin Microbiol* 2010, **13**(5):632-639.
- 447 40. Qin L, McCausland JW, Cheung GY, Otto M: **PSM-Mec-A Virulence Determinant that**  
448 **Connects Transcriptional Regulation, Virulence, and Antibiotic Resistance in**  
449 **Staphylococci.** *Frontiers in microbiology* 2016, **7**:1293.
- 450 41. Tolo I, Thomas JC, Fischer RS, Brown EL, Gray BM, Robinson DA: **Do Staphylococcus**  
451 **epidermidis Genetic Clusters Predict Isolation Sources?** *J Clin Microbiol* 2016,  
452 **54**(7):1711-1719.
- 453 42. Rasko DA, Webster DR, Sahl JW, Bashir A, Boisen N, Scheutz F, Paxinos EE, Sebra R,  
454 Chin CS, Iliopoulos D *et al*: **Origins of the E. coli strain causing an outbreak of**  
455 **hemolytic-uremic syndrome in Germany.** *N Engl J Med* 2011, **365**(8):709-717.
- 456 43. Pankhurst LJ, Del Ojo Elias C, Votintseva AA, Walker TM, Cole K, Davies J, Fermont JM,  
457 Gascoyne-Binzi DM, Kohl TA, Kong C *et al*: **Rapid, comprehensive, and affordable**  
458 **mycobacterial diagnosis with whole-genome sequencing: a prospective study.**  
459 *Lancet Respir Med* 2016, **4**(1):49-58.
- 460 44. Wang Y, Kuo S, Shu M, Yu J, Huang S, Dai A, Two A, Gallo RL, Huang CM:  
461 **Staphylococcus epidermidis in the human skin microbiome mediates fermentation**  
462 **to inhibit the growth of Propionibacterium acnes: implications of probiotics in acne**  
463 **vulgaris.** *Appl Microbiol Biotechnol* 2014, **98**(1):411-424.
- 464 45. Otto M, Echner H, Voelter W, Gotz F: **Pheromone cross-inhibition between**  
465 **Staphylococcus aureus and Staphylococcus epidermidis.** *Infection and immunity*  
466 2001, **69**(3):1957-1960.
- 467 46. Grant JR, Arantes AS, Stothard P: **Comparing thousands of circular genomes using**  
468 **the CGView Comparison Tool.** *BMC Genomics* 2012, **13**:202.

469  
470

471 Figure Legends

472 **Figure 1** Analysis of the *Staphylococcus epidermidis* pan-genome. (a). The distribution of  
473 protein cluster sizes generated from the comparison of 198 *S. epidermidis* genomes using  
474 PanOCT. (b). The pan-genome size (left) and the number of novel genes discovered with the  
475 addition of each new genome (right) were estimated for all 198 genomes using a pan-genome  
476 model based on the original Tettelin et al. model [21].

477 **Figure 2** Functional analysis of the pan-genome of *Staphylococcus epidermidis*. (a).  
478 Distribution of core / dispensable / novel genes in the type strain RP62a. Starting from the  
479 outermost ring the feature rings depict: (1) COG functional categories for forward strand  
480 coding sequences; (2) Core (brown) / Dispensable (blue) genes for forward strand coding  
481 sequences; (3) Forward strand sequence features; (4) Reverse strand sequence features; (5)  
482 Core (brown) / Dispensable (blue) genes for reverse strand coding sequences; (6) COG  
483 functional categories for reverse strand coding sequences. (7) GC content; (8) GC skew. The  
484 colors of different COG functional categories were following the definition of Grant et al.  
485 [46].

486 (b). Numbers of core, dispensable and novel genes for each COG category. COGs  
487 significantly enriched (adjusted  $P$ -value < 0.05, Fisher exact test) in core, dispensable, or  
488 novel genes are marked with red asterisk.

489 **Figure 3** Phylogenetic SNP tree of *Staphylococcus epidermidis* strains. A whole-genome  
490 core SNP maximum likelihood tree was constructed for 198 genomes with kSNP and  
491 RAxML. Heatmap on the right indicates copies of 28 genes involved in antibiotic resistance.  
492 Legends on the bottom stand for copy number of resistant genes.

493 **Figure 4** Heatmap of virulence factors among the *Staphylococcus epidermidis* strains. The  
494 dendrogram was generated using complete linkage clustering of copies of genes involved in  
495 virulence factors. The red color stands for genes that exist in the genomes and the blue color

496 for missing ones. Legends on the right stand for colors of different host, isolates and  
497 geographic information.

498 **Figure 5** *In silico* analysis of virulence factors of the *Staphylococcus epidermidis* strains. The  
499 types of virulence factors were following the VFDBs database. Legends on the right stand for  
500 colors of different host, isolates, and geographic information. Different colors stand for copy  
501 number of each virulence factors.

502

503 Additional files

504 Table S1 Basic information of all strains analyzed used in this study

505 Table S2 Result of COG enrichment analysis across all strains

506 Table S3 Result of KEGG enrichment analysis across all strains

507 Table S4 Cluster of orthologous proteins produced by PanOCT

508 Table S5 Enrichment analysis about antibiotic resistances from different sources

509 Table S6 Enrichment analysis about genes related in biofilm formation

510



### A. PanOCT Cluster Size Distribution

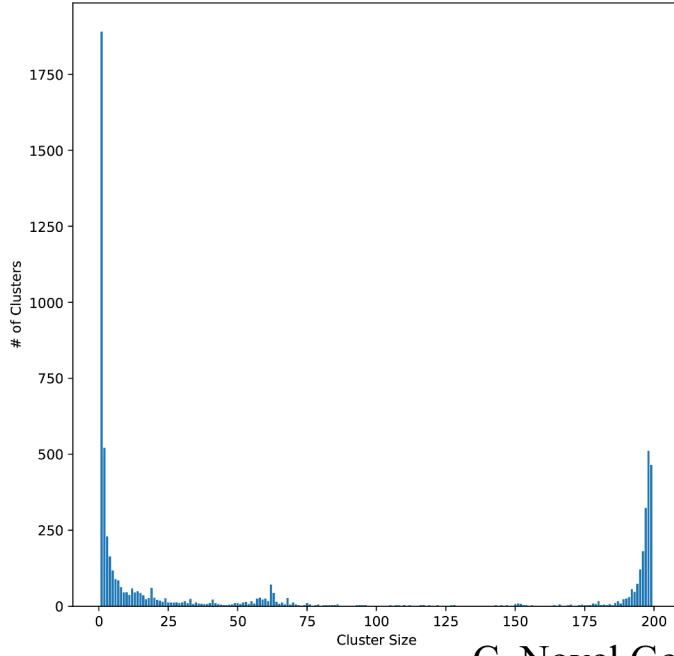

### B. Pan-Genome

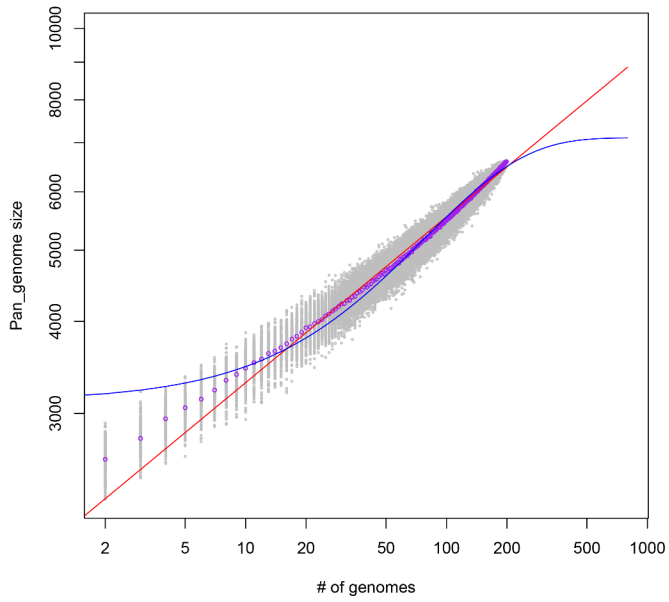

### C. Novel Genes

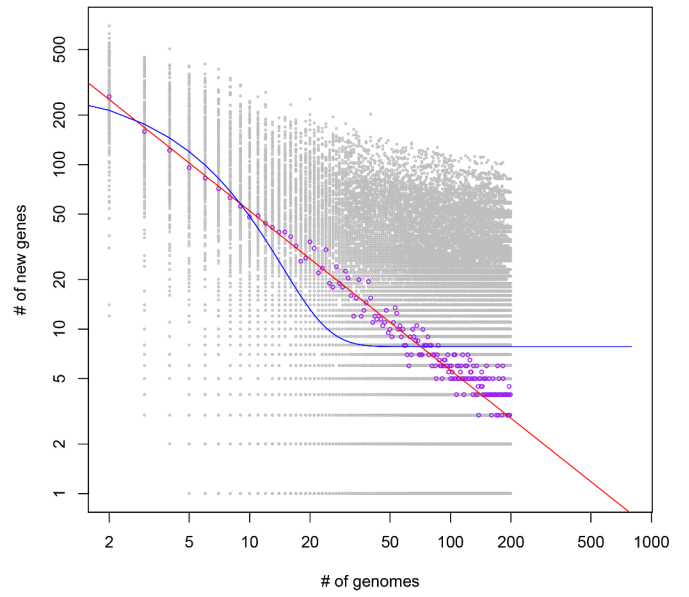

A.

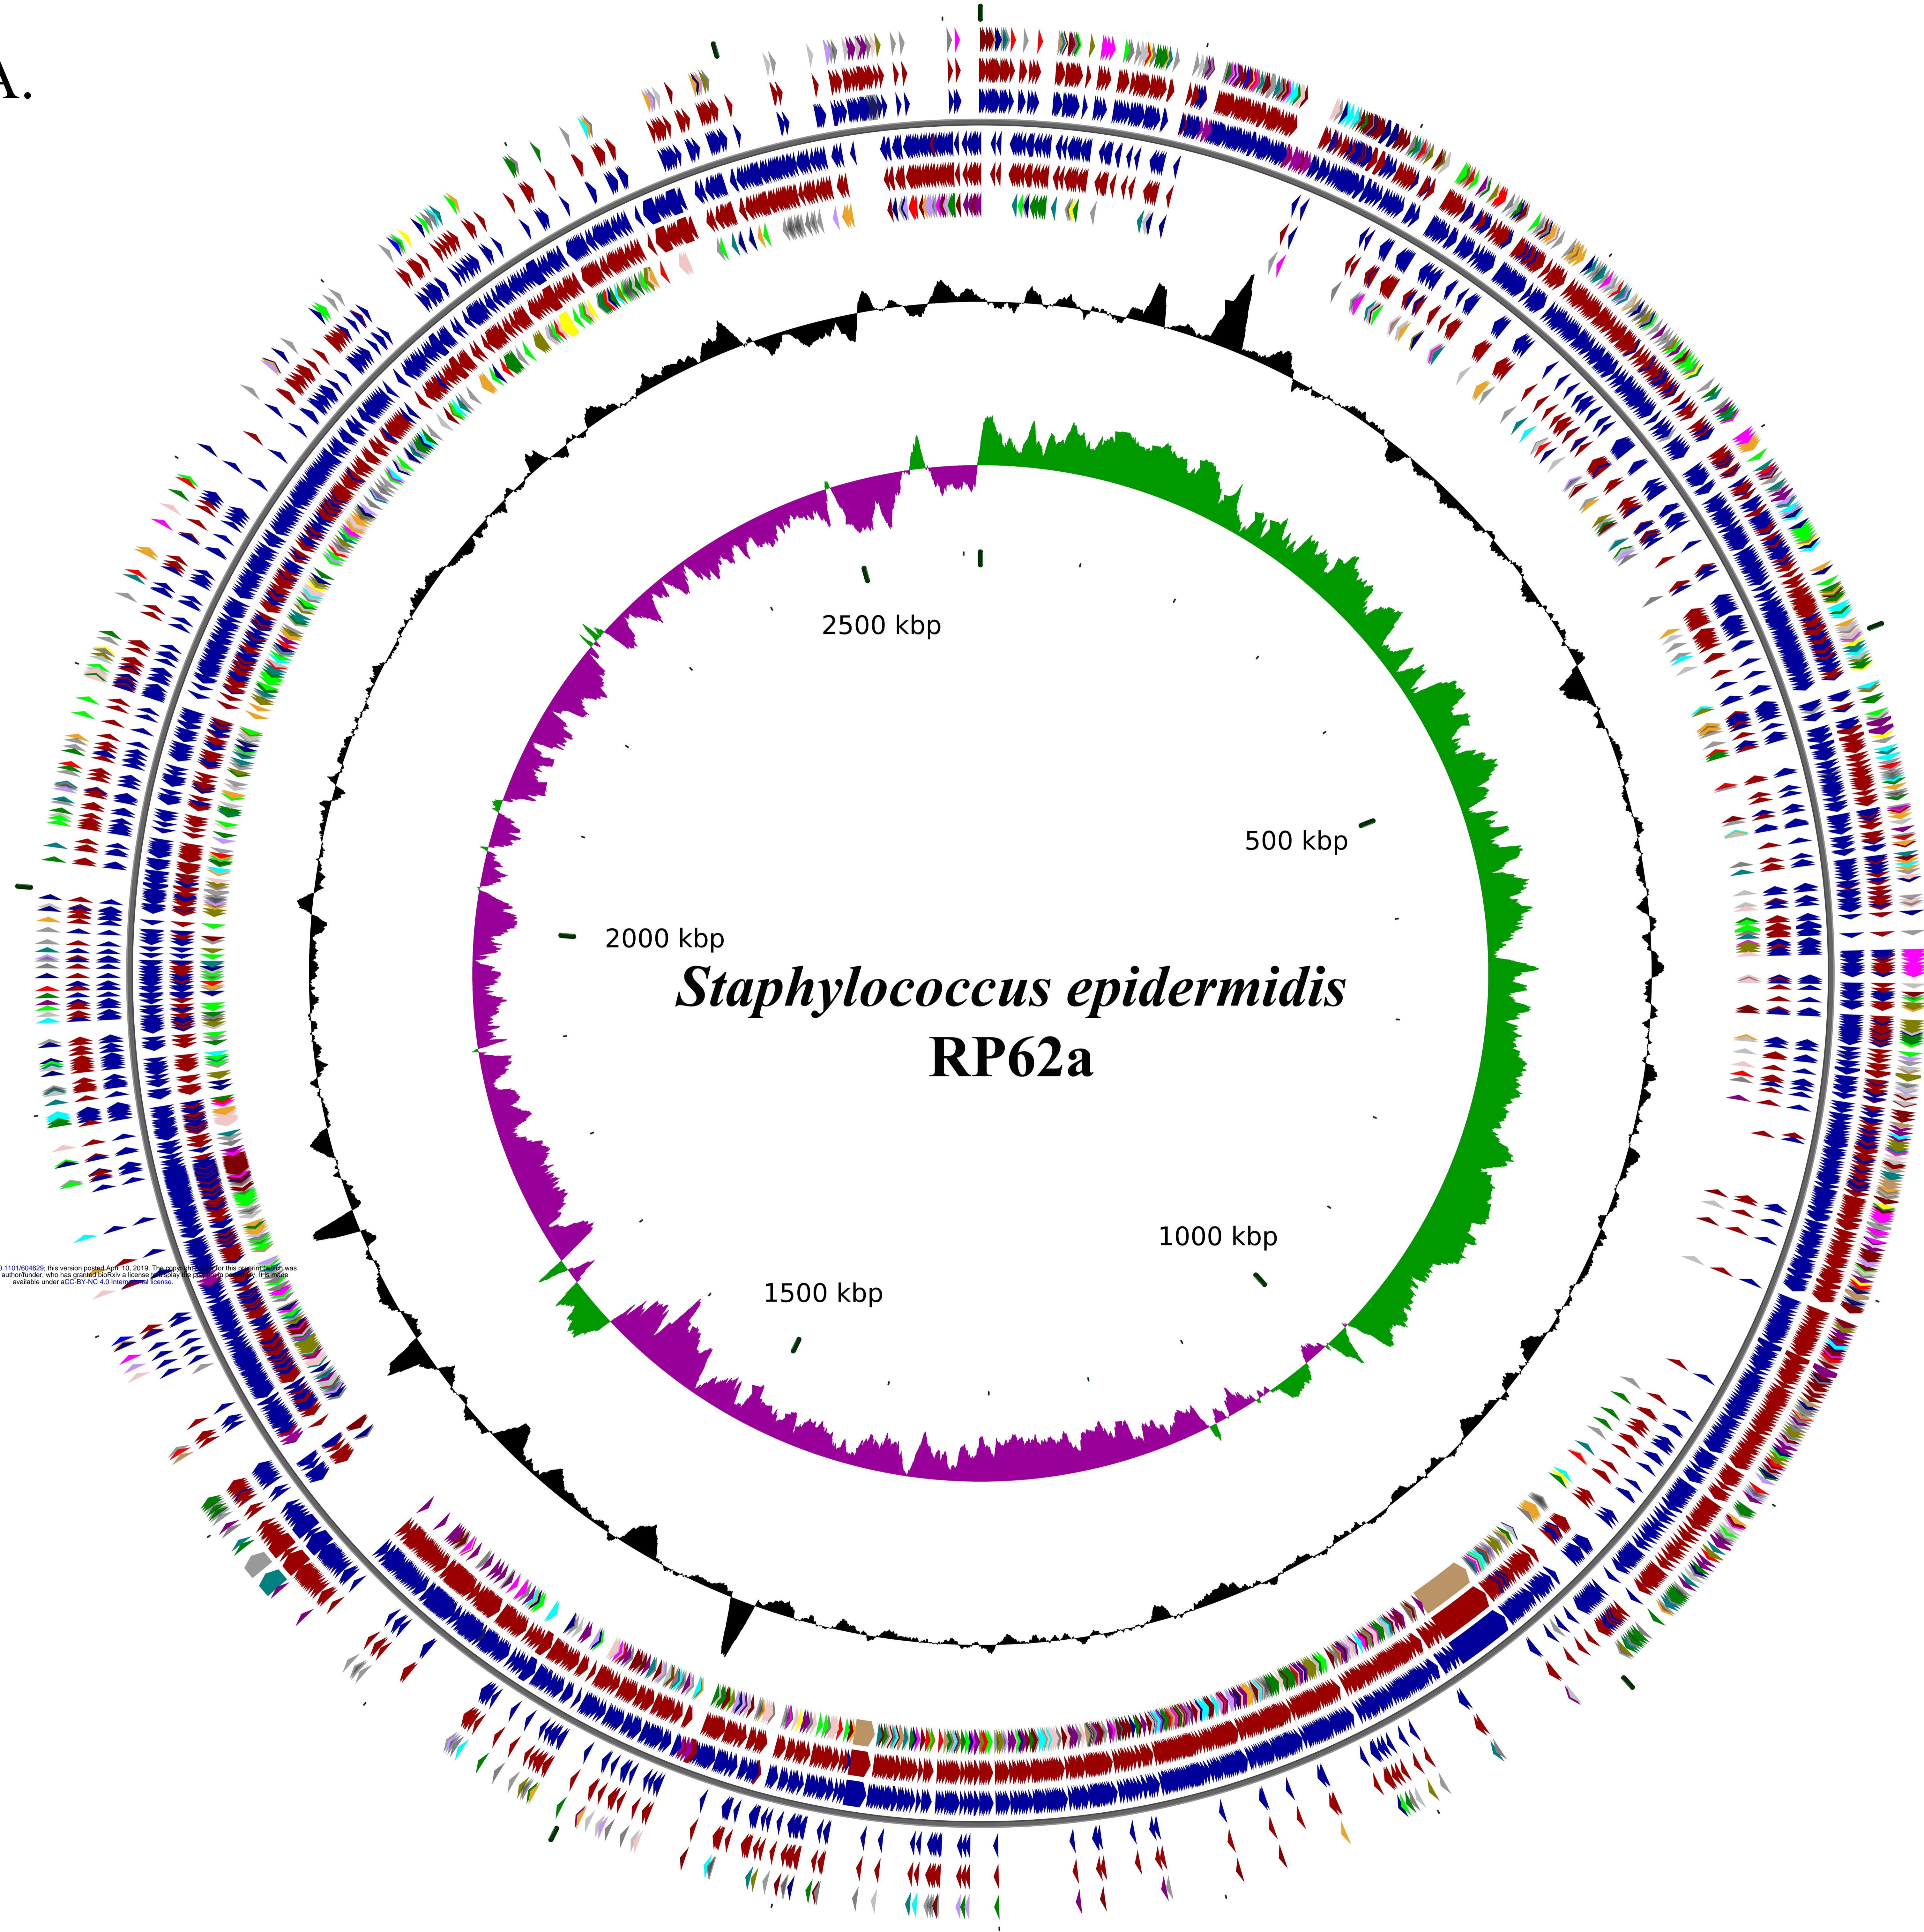

B.

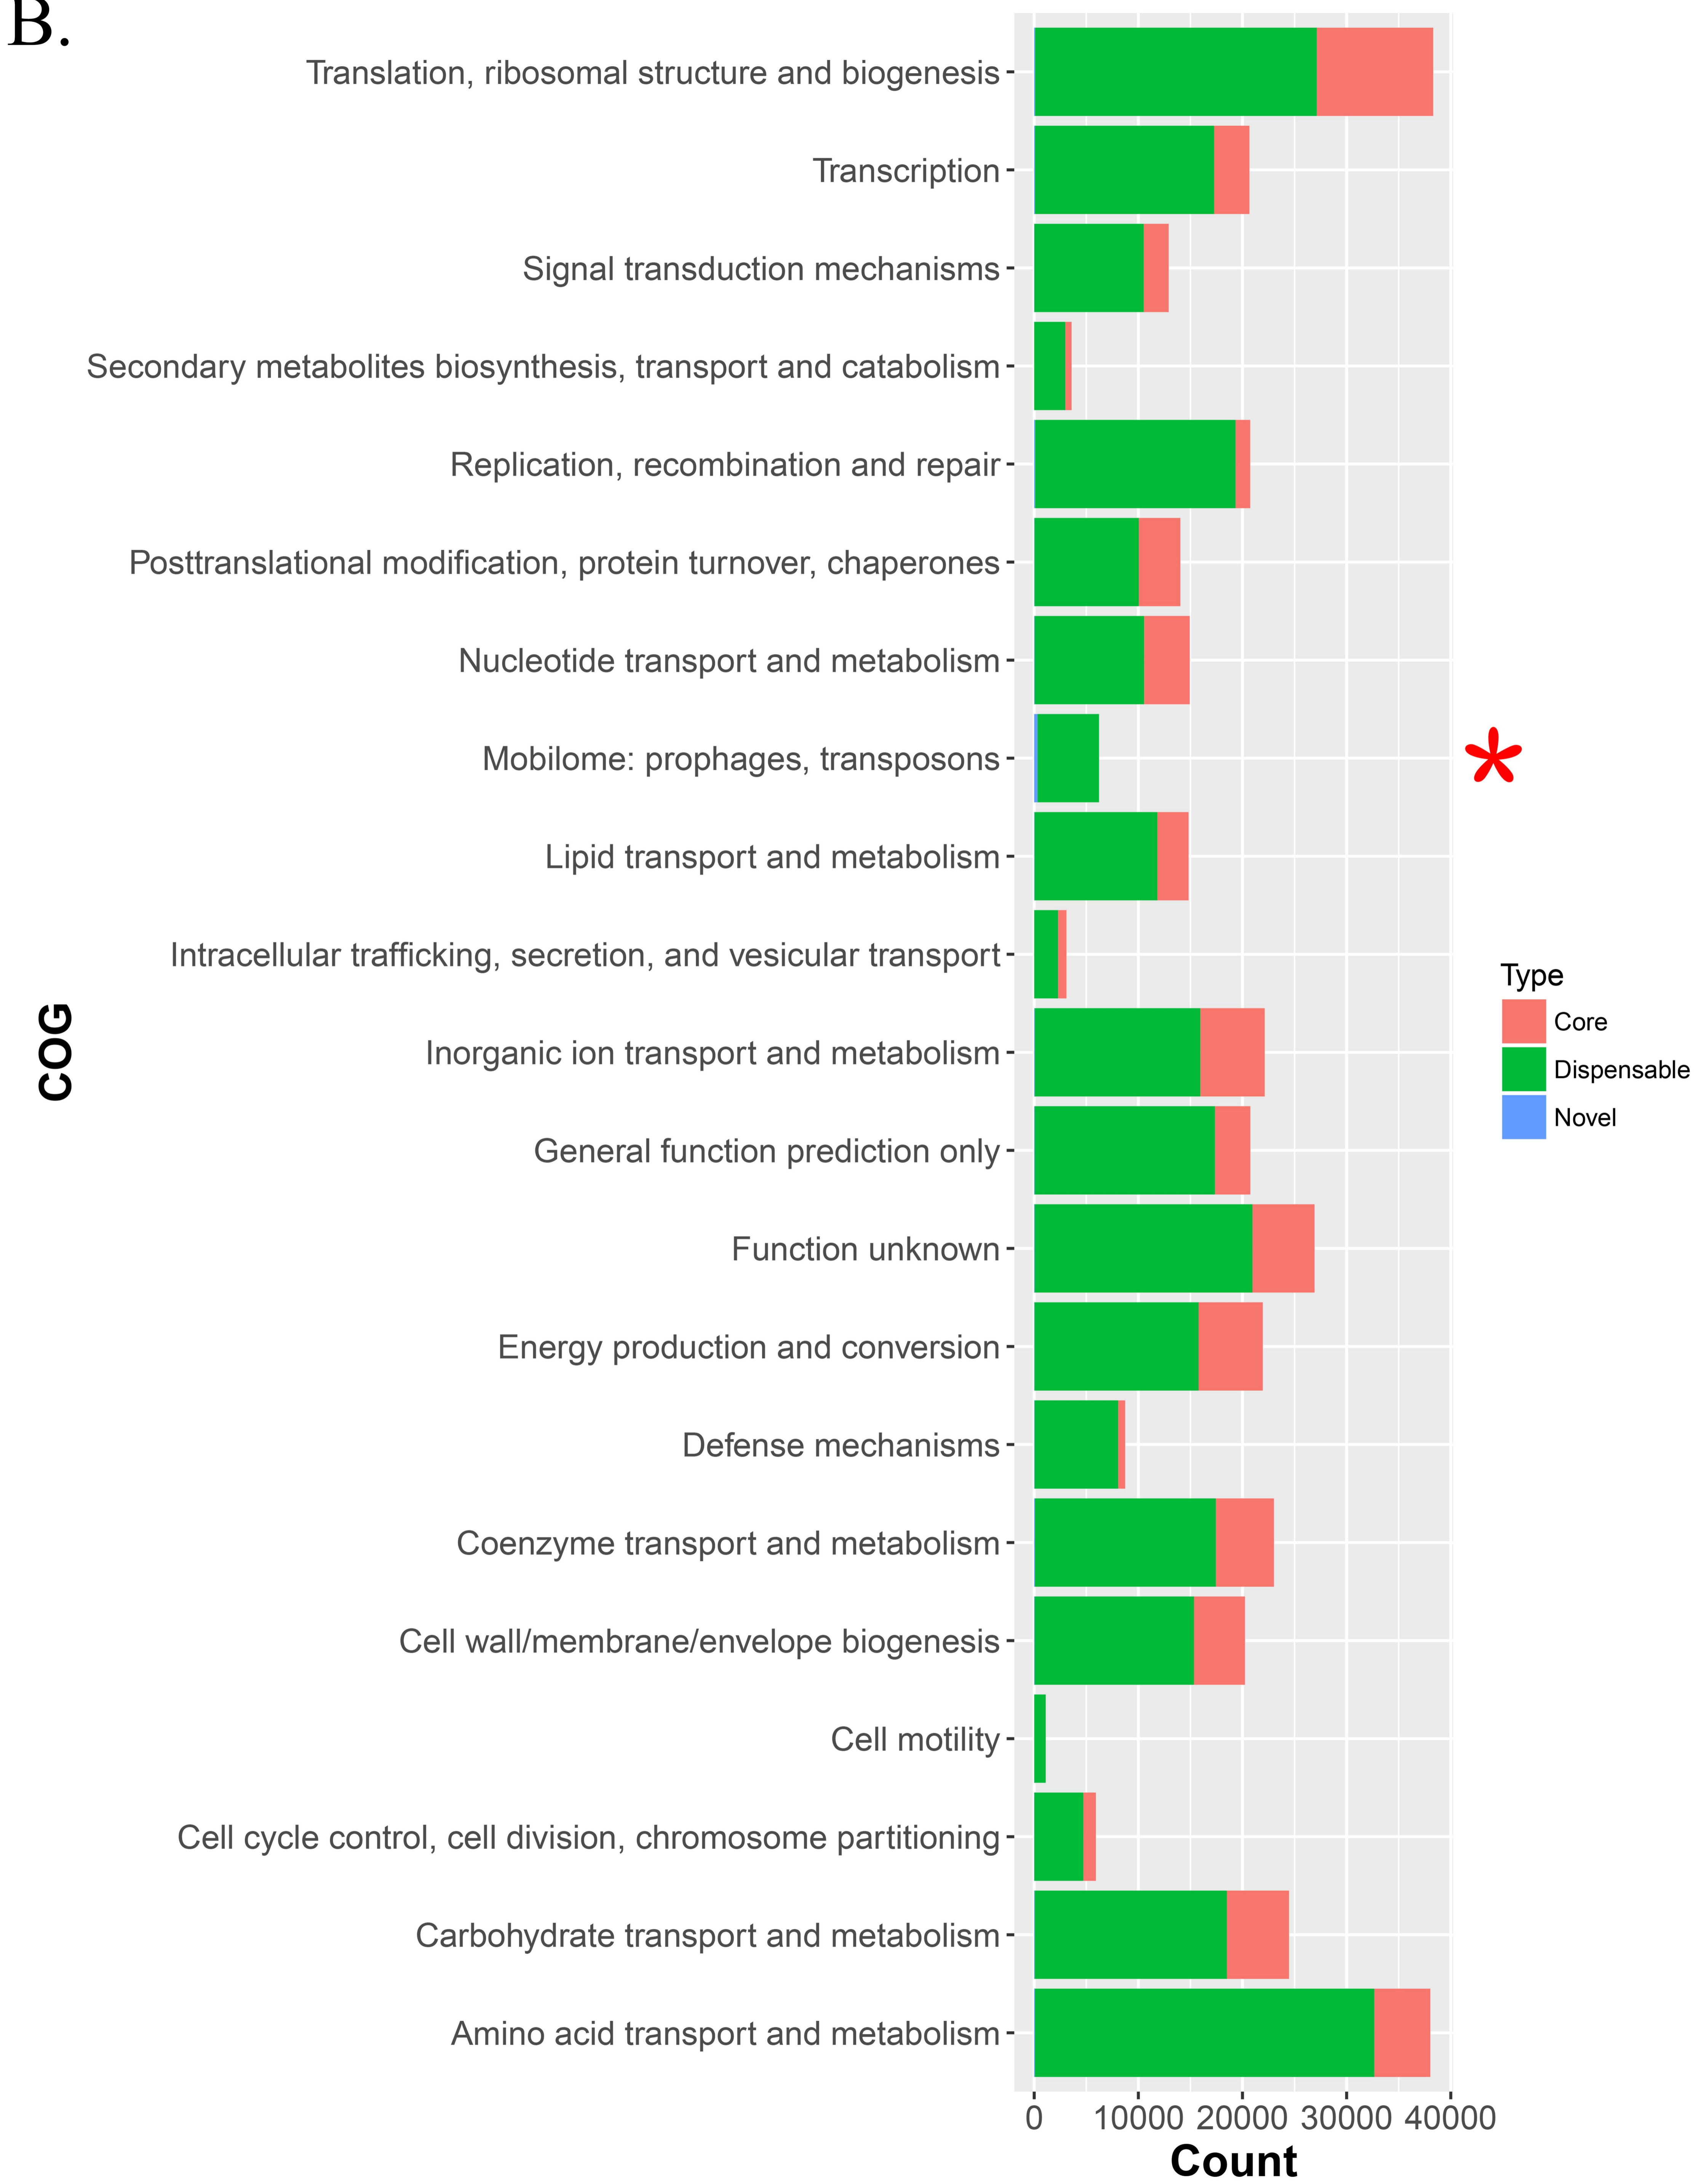

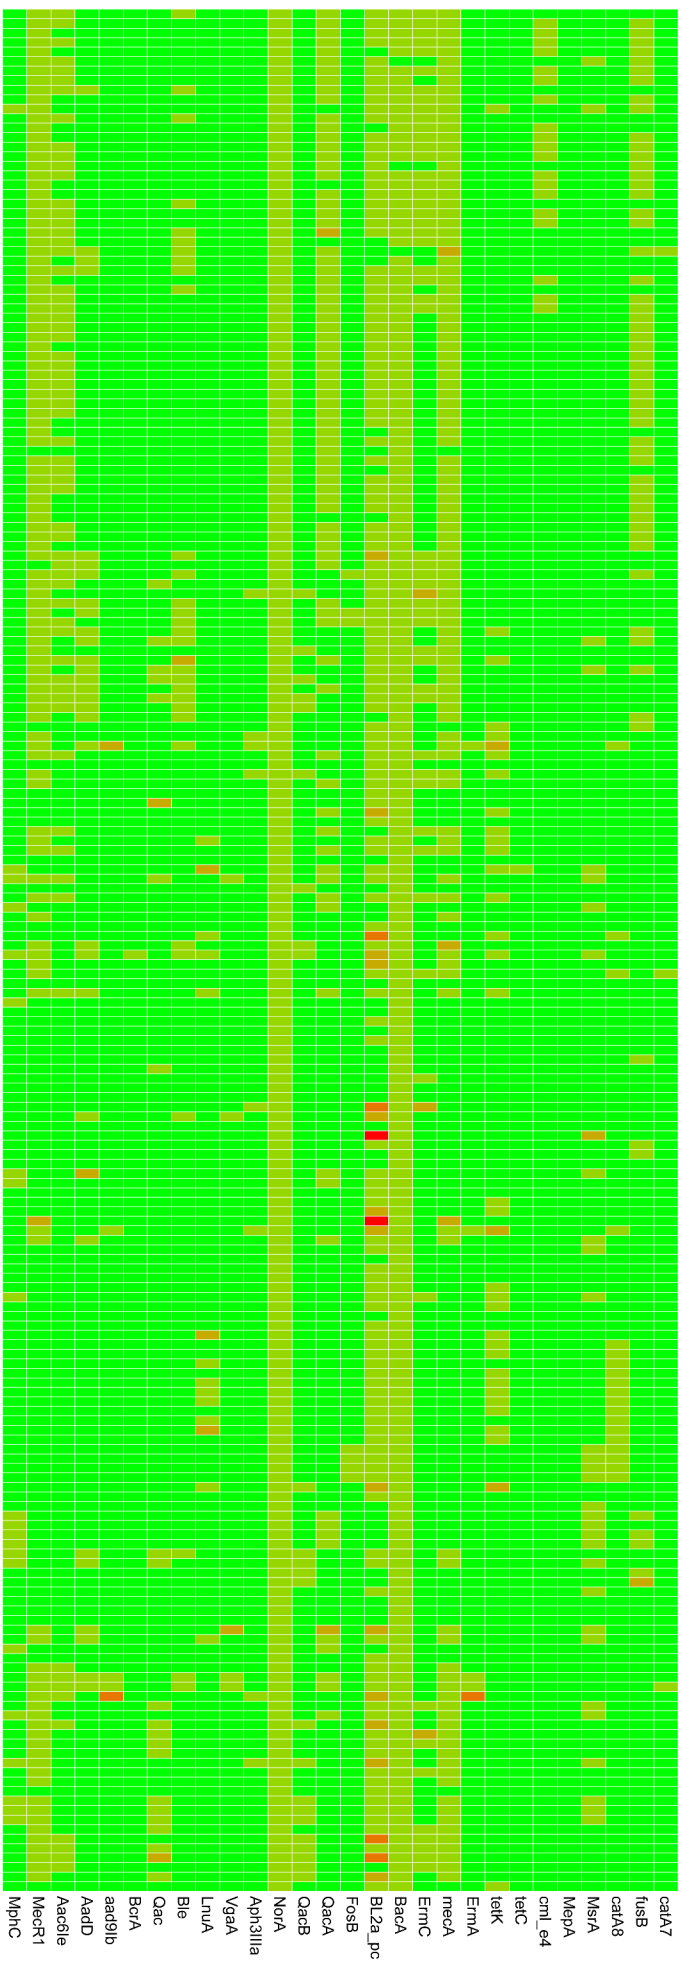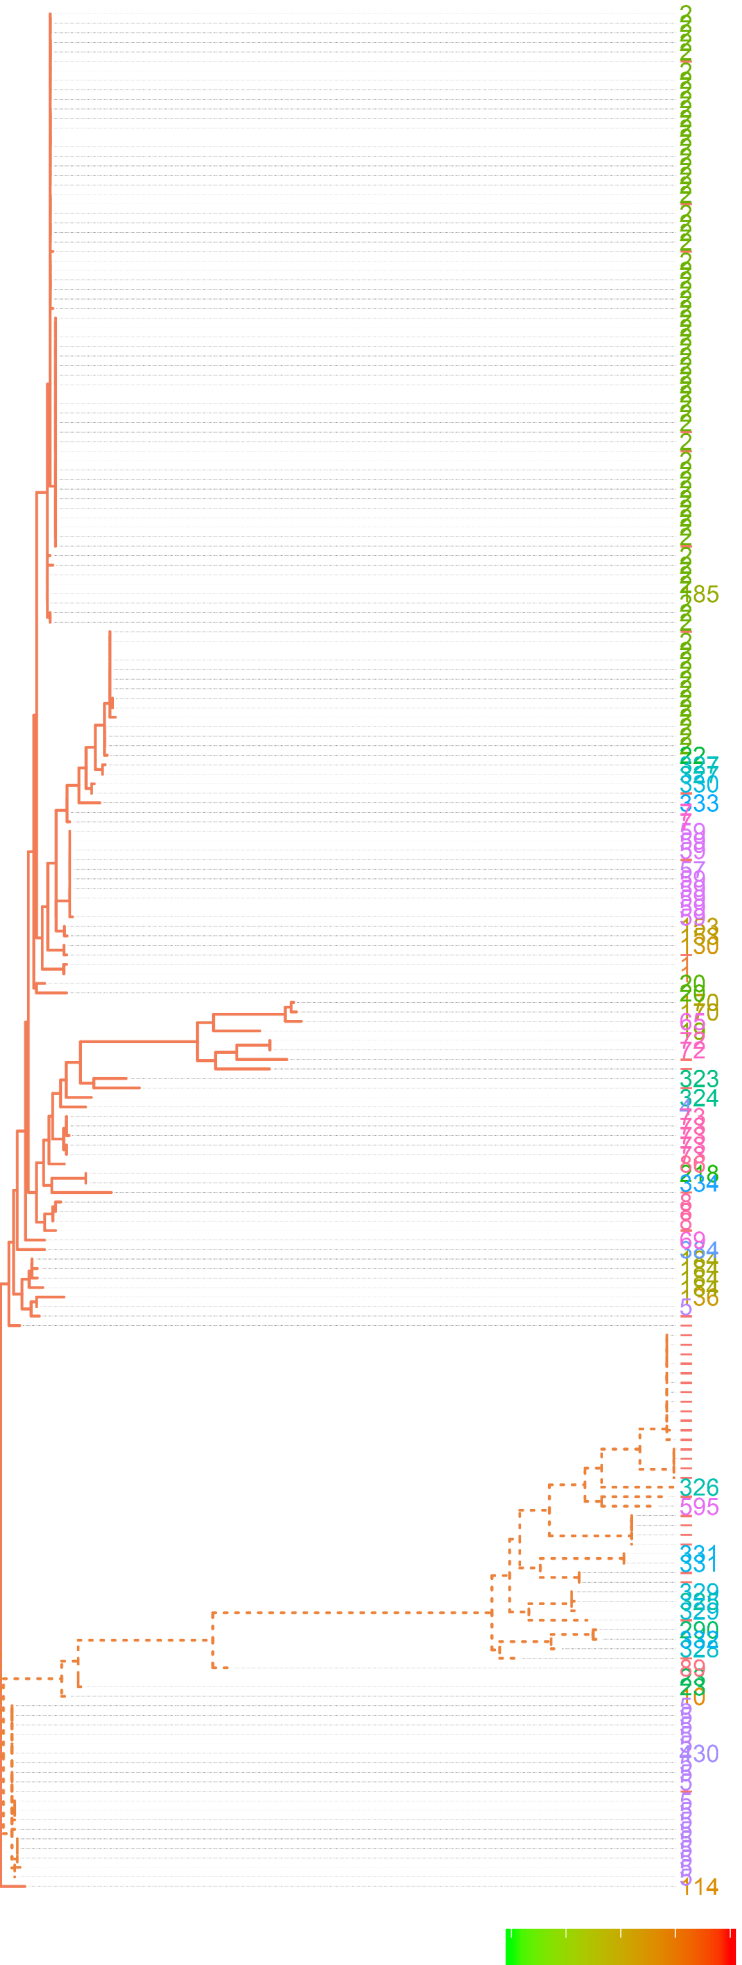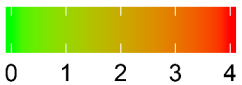

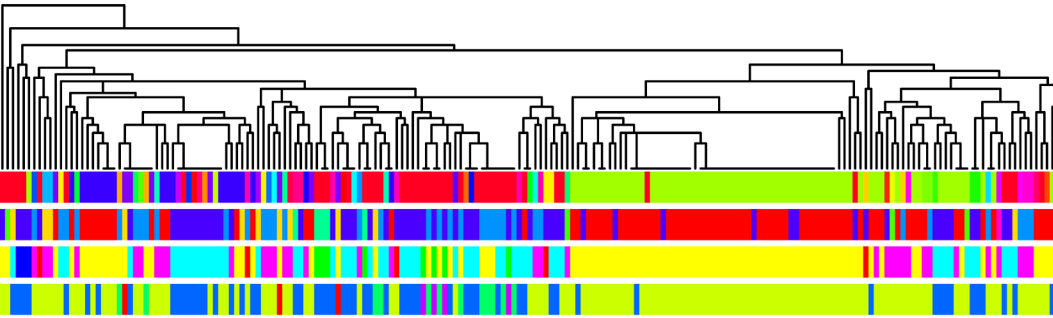

**ST**  
**Source**  
**Location**  
**Host**

**Source**  
 Blood  
 Environ  
 Lung  
 Plants  
 Skin  
 Unknown  
 Urine

**Location**  
 Denmark  
 Germany  
 India  
 Other  
 Russia  
 USA

**Host**  
 Cow  
 Human  
 Mouse  
 Other  
 Rice

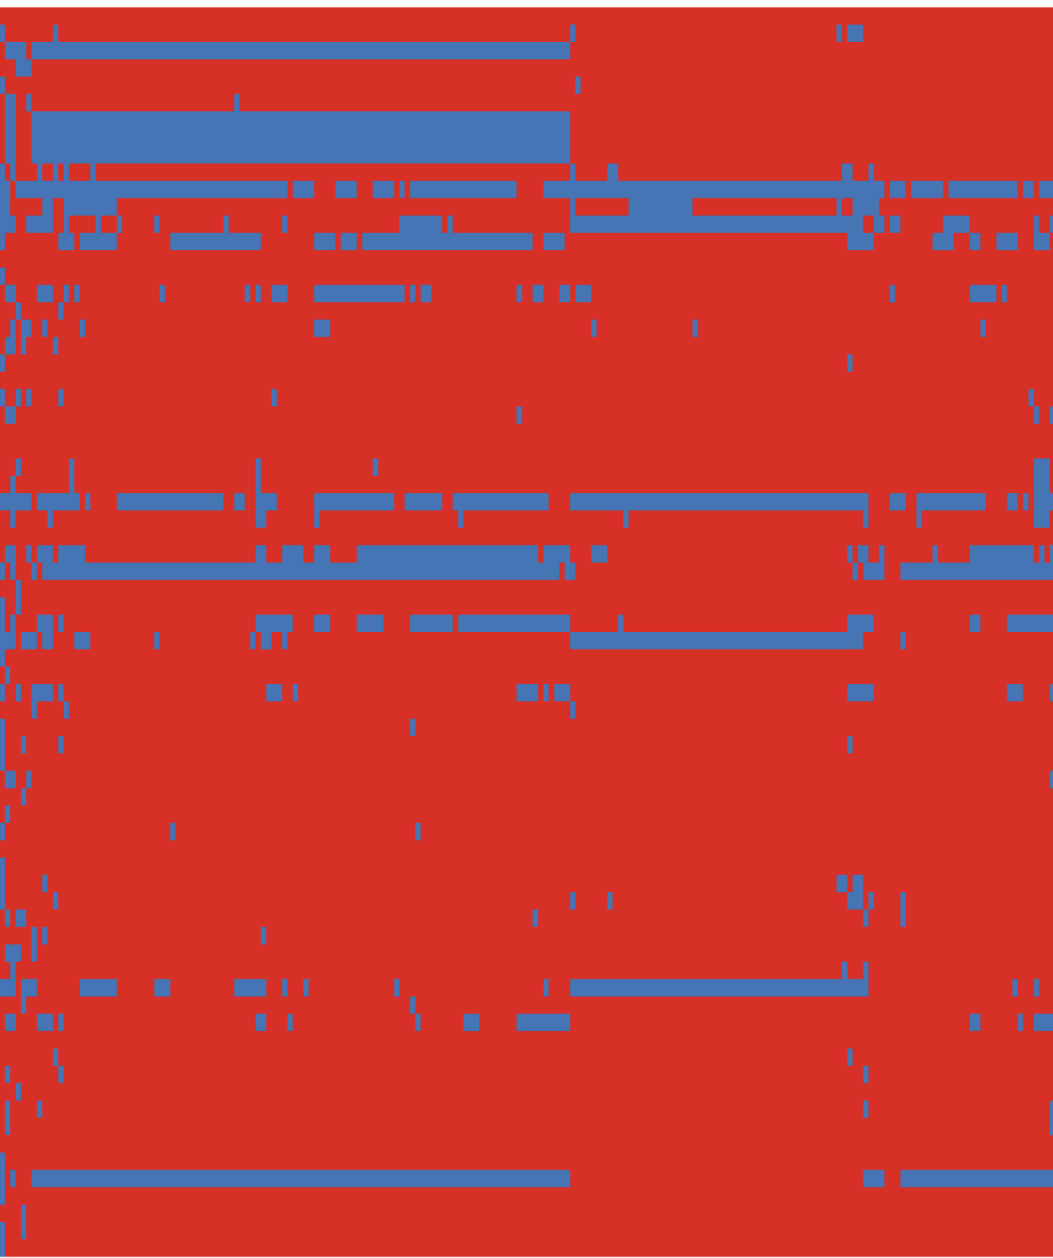

- Capsule(capC)
- Thermonuclease(nuc)
- Polysaccharide\_intercellular\_adhesin(icaA)
- Staphyloferrins
- Antimicrobial\_peptide\_sensor(apsX)
- Lipase(geh1)
- Polysaccharide\_intercellular\_adhesin(icaC)
- Polysaccharide\_intercellular\_adhesin(icaB)
- Polysaccharide\_intercellular\_adhesin(icaD)
- surface\_protein\_H(sesH)
- surface\_protein\_G(sesG)
- Serine-aspartate\_repeat-containing\_protein\_H(sdrH)
- Serine-aspartate\_repeat-containing\_protein\_G(sdrG)
- Phenol-soluble\_modulins(hld)
- d-alanylation\_of\_teichoic\_acids(dltA)
- Antimicrobial\_peptide\_sensor(apsR)
- Serine-aspartate\_repeat-containing\_protein\_F(sdrF)
- eDNA(atlE)
- surface\_protein\_E(sesE)
- beta-hemolysin(hlb)
- Teichoic\_acids(tagA)
- Esterase\_1
- Antimicrobial\_peptide\_sensor(apsS)
- Biofilm-associated\_protein\_homolog(bhp)
- d-alanylation\_of\_teichoic\_acids(dltC)
- d-alanylation\_of\_teichoic\_acids(dltD)
- Phenol-soluble\_modulins\_1
- Phenol-soluble\_modulins\_2
- Phenol-soluble\_modulins\_3
- Phenol-soluble\_modulins\_4
- Capsule(capB)
- Accumulation-associated\_protein(aap)
- surface\_protein\_I(sesI)
- eDNA(cidA)
- Lipase(lipA)
- Phenol-soluble\_modulins\_5
- surface\_protein\_A(sesA)
- Teichoic\_acids(tagD)
- Clp\_Protease(clpX)
- protease(Serine)
- Clp\_Protease(clpB)
- Teichoic\_acids(tagX)
- Teichoic\_acids(tagH)
- vraFG(vraG)
- Lipase(geh2)
- Clp\_Protease(clpC)
- Autolysin/adhesin(aae)
- vraFG(vraF)
- Capsule(capD)
- Teichoic\_acids(tagB)
- Serine\_V8\_protease(sspA)
- Multiple\_peptide\_resistance\_factor(mprF)
- Lipase(lip)
- Capsule(capA)
- Lipase(geh)
- Hemolysin
- Extracellular\_matrix\_binding\_protein(ebh)
- d-alanylation\_of\_teichoic\_acids(dltB)
- Phenol-soluble\_modulins\_6
- Esterase\_2
- Hemolysin\_III
- Zinc\_metalloprotease
- surface\_protein\_C(sesC)
- Cysteine\_protease(sspB)
- Cysteine\_protease(sspC)
- Clp\_Protease(clpP)
- Teichoic\_acids(tagG)
- Nuclease
- Iron\_transporter(sitA)
- Elastase(sepA)
- Iron\_transporter(sitC)
- Iron\_transporter(sitB)

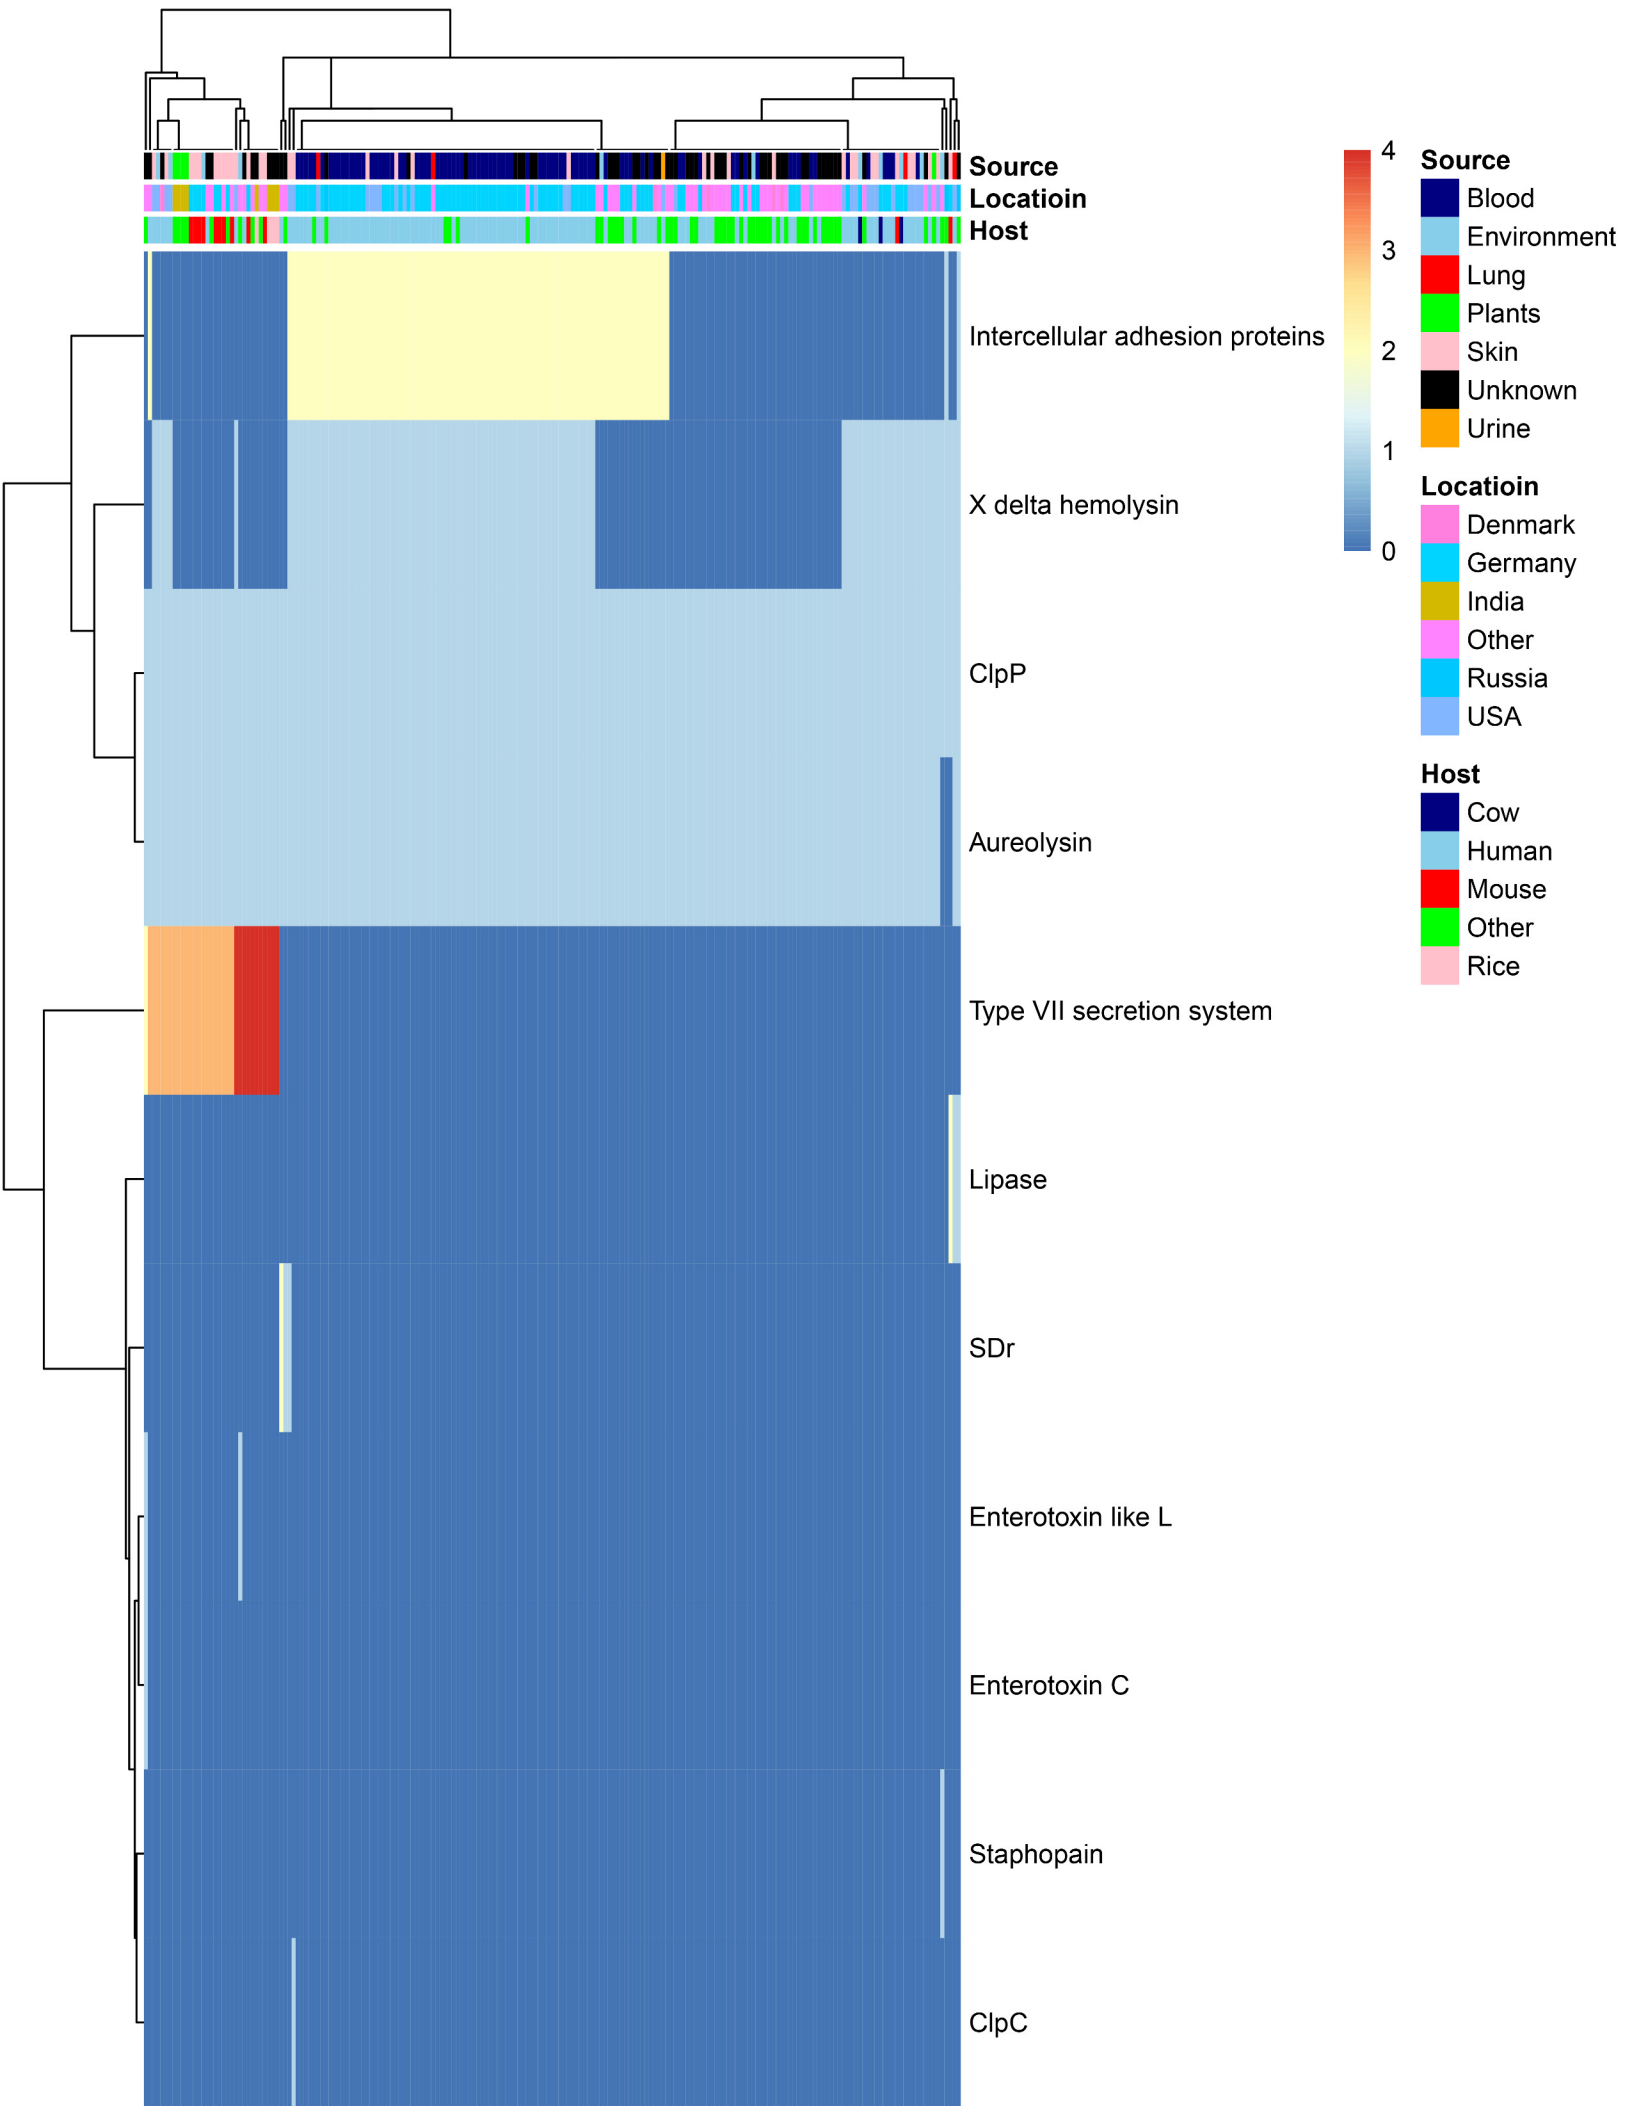

Source: https://biorxiv.org/content/biorxiv/early/2019/04/10/604629.full-text.pdf
